# Supplementary material for: Investigating the current environmental situation in the Middle East and North Africa (MENA) region during the third wave of COVID-19 pandemic: urban vs. rural context
Source: Springer Nature journal article supplement (doi:10.1186/s12889-021-12313-3), 2022-01-26
Supplement: MOESM2 [file 20069992]

## 1. Survey validation

| items       | Numbers of questions in each item | Cronbach's Alpha | Cronbach's Alpha Based on Standardized Items |
|-------------|-----------------------------------|------------------|----------------------------------------------|
| Domain II   | 7                                 | 0.811            | 0.813                                        |
| Domain III  | 8                                 | 0.728            | 0.731                                        |
| Total items | 15                                | 0.819            | 0.818                                        |

### 1.1.Domain II: the impact of COVID-19 on the environment

| Questions          | Mean  | SD    | alpha |
|--------------------|-------|-------|-------|
| Q7                 | 3.333 | 0.992 | 0.787 |
| Q8                 | 3.346 | 1.024 | 0.789 |
| Q9                 | 3.125 | 1.042 | 0.785 |
| Q10                | 3.466 | 1.235 | 0.773 |
| Q11                | 3.803 | 1.03  | 0.806 |
| Q12                | 3.264 | 1.376 | 0.778 |
| Q13                | 2.856 | 1.421 | 0.778 |
| Reliability alpha  | 0.811 |       |       |
| Standardized alpha | 0.813 |       |       |

### 1.2.Domain III: the impact of COVID-19 on pollution increase

| Questions          | Mean  | SD    | alpha |
|--------------------|-------|-------|-------|
| Q14                | 3.744 | 1.102 | 0.728 |
| Q15                | 3.193 | 0.953 | 0.692 |
| Q16                | 3.058 | 1.222 | 0.68  |
| Q17                | 3.006 | 0.993 | 0.678 |
| Q18                | 3.405 | 1.089 | 0.702 |
| Q19                | 3.524 | 0.988 | 0.7   |
| Q20                | 3.438 | 0.951 | 0.7   |
| Q21                | 3.035 | 1.09  | 0.722 |
| Reliability alpha  | 0.728 |       |       |
| Standardized alpha | 0.731 |       |       |

### 1.3. Total survey

| <b>Questions</b>          | <b>Mean</b> | <b>SD</b> | <b>alpha</b> |
|---------------------------|-------------|-----------|--------------|
| <b>Q7</b>                 | 3.333       | 0.992     | 0.806        |
| <b>Q8</b>                 | 3.346       | 1.024     | 0.805        |
| <b>Q9</b>                 | 3.125       | 1.042     | 0.805        |
| <b>Q10</b>                | 3.466       | 1.235     | 0.802        |
| <b>Q11</b>                | 3.803       | 1.03      | 0.813        |
| <b>Q12</b>                | 3.264       | 1.376     | 0.803        |
| <b>Q13</b>                | 2.856       | 1.421     | 0.798        |
| <b>Q14</b>                | 3.744       | 1.102     | 0.815        |
| <b>Q15</b>                | 3.193       | 0.953     | 0.809        |
| <b>Q16</b>                | 3.058       | 1.222     | 0.804        |
| <b>Q17</b>                | 3.006       | 0.993     | 0.807        |
| <b>Q18</b>                | 3.405       | 1.089     | 0.817        |
| <b>Q19</b>                | 3.524       | 0.988     | 0.817        |
| <b>Q20</b>                | 3.438       | 0.951     | 0.817        |
| <b>Q21</b>                | 3.035       | 1.09      | 0.814        |
| <b>Reliability alpha</b>  | 0.819       |           |              |
| <b>Standardized alpha</b> | 0.818       |           |              |

## 2. Sample Size calculation

To calculate the sample size for the pilot study, the following equation was used.

$$n_0 = \frac{z^2 \times p(1-p)}{e^2}$$

- $n_0$  - Sample size, which was estimated
- $z^2$  - The selected critical value of the desired level of confidence or risk
- $p$  - The estimated proportion of an attribute that is present in the population or maximum variability of the population
- $e$  - The desired level of precision or margin of error

In our case, since the population number is unknown.

- $n_0$  - ?
- $z^2$  - 95% confidence level (The value of  $(1-\alpha)$  in Standard Normal Distribution z-table, which is 1.96 for 95%)
- $p$  - 50% variability of the population (which is maximum)
- $e$  - 5% margin of error

Put the value in the given formula-

$$n_0 = \frac{(1.96)^2 \times 0.5(1 - 0.5)}{(0.05)^2} = 384$$
